# Supplementary material
Source: Springer Nature journal article supplement (https://www.springermedizin.de/resource/supplementary/12895_2009_102_MOESM4_ESM.pdf/9514106)

# ROC Curve

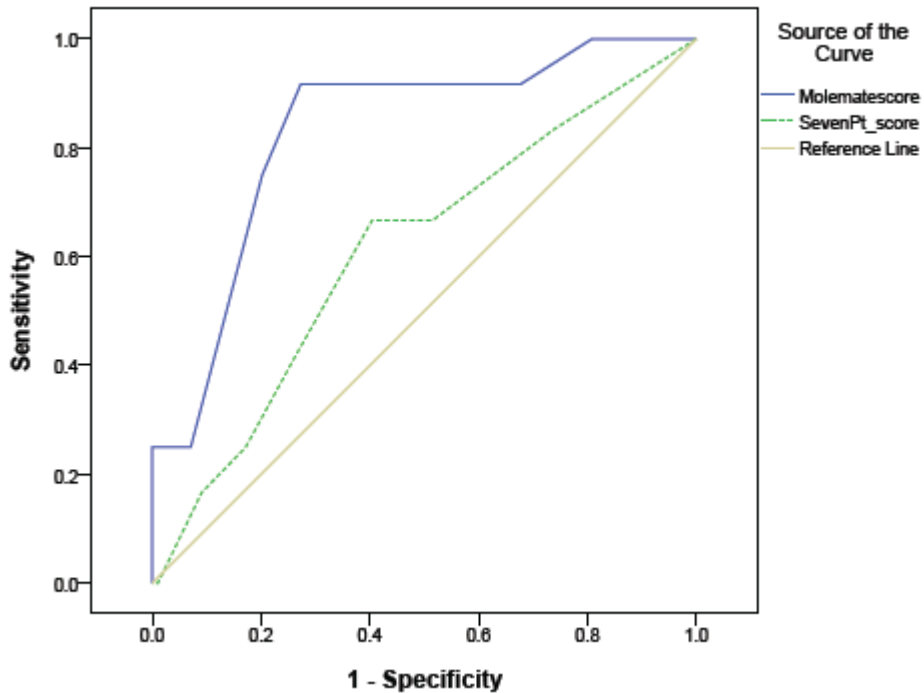

Supplement: MOESM4 [file 9514106]
